1 **Demographic history of a remote ichthyofauna assemblage reveals common**  
2 **processes driving colonization and persistence in endemic coral reef fishes**

3

4 Erwan Delrieu-Trottin<sup>1,2,3</sup>, Nicolas Hubert<sup>2</sup>, Emily C. Giles<sup>1</sup>, Pascaline Chifflet-Belle<sup>4,5</sup>,  
5 Arnaud Suwalski<sup>4,5</sup>, Valentina Neglia<sup>1</sup>, Cristian Rapu-Edmunds<sup>6</sup>, Stefano Mona<sup>4,5,†</sup>,  
6 Pablo Saenz-Agudelo<sup>1,†</sup>

7

8 <sup>1</sup>*Instituto de Ciencias Ambientales y Evolutivas, Universidad Austral de Chile, Valdivia,*  
9 *Chile*

10 <sup>2</sup>*Institut de Recherche pour le Développement, UMR 5554 (UM-CNRS-IRD-EPHE),*  
11 *ISEM, Montpellier, France.*

12 <sup>3</sup>*Museum für Naturkunde, Leibniz-Institut für Evolutions-und Biodiversitätsforschung*  
13 *an der Humboldt-Universität zu Berlin, Berlin, Germany*

14 <sup>4</sup>*Institut de Systématique, Evolution, Biodiversité, ISYEB, Muséum*  
15 *national d'Histoire naturelle, CNRS, Sorbonne Université, EPHE, Université des*  
16 *Antilles, Paris, France*

17 <sup>5</sup>*EPHE, PSL Research University, Paris, France*

18 <sup>6</sup>*Mike Rapu Diving Center, Caleta Hanga Roa O'tai, Chile*

19

20 <sup>†</sup>*These authors jointly supervised this work.*

21

22 *Author for correspondence: Erwan Delrieu-Trottin, e-mail:*

23 *erwan.delrieu.trottin@gmail.com*

24

25 **Keywords:** endemism, speciation, colonization, ddRADs, Easter Island, Rapa Nui

26 Elucidating demographic history during the settlement of ecological communities is  
27 crucial to properly inferring the mechanisms that shape species diversity and their  
28 persistence through time. We used genomic data to elucidate for the first time the  
29 demographic dynamics associated with the settlement by endemic reef fish fauna of  
30 one of the most isolated islands of the Pacific Ocean, Rapa Nui (Easter Island). We  
31 compared the demographic history of nine endemic species including seven small-  
32 range (restricted to Rapa Nui and Motu Motiro Hiva) and two large-range (present in  
33 Rapa Nui and other southern subtropical islands of the Pacific) endemic species in  
34 order to explore the onset of community settlement and associated demographic  
35 history. We found that most Rapa Nui endemic species share a common demographic  
36 history, with a demographic expansion initiated during the last interglacial period and  
37 related to the last sea level high-stand. The commonality of this pattern suggests that  
38 eustatic fluctuations associated with Milankovitch cycles have played a central role in  
39 species demographic history and the final stage of contemporary community assembly  
40 of Rapa Nui reef fishes. We discuss the potential role of seamounts in the colonization /  
41 extinction / recolonization dynamics of populations of the Rapa Nui Archipelago.  
42

## 43 **1. Introduction**

44           Local and regional processes jointly drive community assembly, *i.e.* the  
45 dynamics of species aggregations in ecological communities and the number of  
46 coexisting species at a given place. The importance and nature of local (e.g.  
47 environmental filtering, species interactions inside a community) and regional (e.g.  
48 dispersal, immigration of new species from outside of a community) processes in the  
49 origin and maintenance of biodiversity in communities is one of the oldest question in  
50 ecology [1,2]. Phylogenetic analysis of community assembly can give a better  
51 understanding of the relative importance of local and regional dynamics in shaping  
52 community assembly [3] as they provide a temporal framework [4]. However, the  
53 difficulty of reconstructing accurate divergence times between species due to the  
54 incompleteness of available phylogenies limit the power of such analyses. In the  
55 meantime, community assembly, especially in island systems, is known to be dynamic,  
56 with regular colonization / extinction / and recolonization of populations occurring  
57 through time [2,5,6], processes which cannot be assessed using species level  
58 approaches. Investigate shallower time scale, population genetics can provide insights  
59 into both assembly time and species demographic history during community assembly,  
60 hence helping understanding the mechanisms by which species persist through time.  
61 Thus by comparing the demographic histories of multiple species in a community and  
62 estimating the timing of the early stages of community assembly, it is possible to  
63 disentangle not only the relative contribution of historical (e.g. tectonic, eustatic  
64 changes) and ecological (e.g. competitive exclusion, habitat filtering) dynamics but also  
65 the scale of the processes (local vs. regional) in shaping the final stage of  
66 contemporary community assembly.

67

68           Rapa Nui (Easter Island, Chile, 166 km<sup>2</sup>) is one of the most remote islands on  
69 Earth and hosts an exceptional reef fish community. The mechanisms at the origin of

70 this diversity and its persistence through time remain enigmatic. Rapa Nui (RN) is the  
71 second hotspot of endemism of the Indo-Pacific Ocean, with 21.7% of fishes endemic  
72 to these islands [7,8]. This reef fish community is known for being extremely species  
73 poor (only 169 fish species; 139 shore fishes) compared to the species-rich islands of  
74 the Indo-Australian Archipelago for instance. RN and the islet Motu Motiro Hiva (MMH)  
75 (Salas y Gómez, 0.15 km<sup>2</sup>), located 400 km further east, which shares the same reef  
76 fish fauna as RN [9], constitute the only two emerged islands of the Easter Chain. RN  
77 and MMH are relatively young; 2.5 and 1.7 My, respectively [10], but they are  
78 embedded in a network of numerous seamounts. This seamount chain extends 2,232  
79 km east to the Nazca seamount (23°360 S et 83°300 W) [10,11] and these mounts  
80 have emerged to various degrees during periods of low sea level. In this context, an  
81 "Ancient Archipelago" hypothesis has been formulated to account for the high level of  
82 endemism observed in RN and MMH, young islands, hypothesizing that "most if not all  
83 endemic species were acquired from elsewhere in the region" [12]. Seamounts, which  
84 were once likely islands, could have provided potentially suitable habitat for at least the  
85 past 29 My for endemics of the region to evolve and persist up to present times [12].  
86 However, a recent analysis of the divergence times of endemic species from their  
87 closest relatives has shown that small-range endemics are not older than the  
88 emergence of RN and MMH; they are thus neoendemics [13], thereby questioning the  
89 ancient origin of RN endemics. Yet, the seamounts nearby RN could have played a  
90 major role in long-term species persistence through time, especially during the  
91 Pleistocene. This era is characterized by notable Milankovitch cycles, historical  
92 processes resulting in the alternation of glacial and inter-glacial time that resulted in  
93 sea levels 150 m below present level. Such paleo-environmental perturbations might  
94 be expected to have left a footprint of bottlenecks and expansions in the demographic  
95 history of populations of many marine species [14–17]. These major sea level changes  
96 altered shallow water habitats; exposing continental shelves during low sea levels but

97 also giving access to habitat otherwise too deep to colonize such as relatively shallow  
98 seamounts. Thus, these features of the Pleistocene could have temporally expanded  
99 the range distribution of endemic species and their population sizes[18].

100

101 Reef fish community assembly in remote islands is dependent on colonization /  
102 extinctions / recolonization processes. The RN reef ichthyofauna is very dynamic;  
103 several species that were reported as being abundant in 1969 in RN waters were then  
104 reported as rare or even absent 16 years later. Along the same line, numerous species  
105 are reported as present in RN waters but are actually vagrants, i.e. species that  
106 colonize RN from time to time without being able to establish a population locally [7].  
107 The endemic RN reef ichthyofauna is composed of two types of endemics, small-range  
108 and large-range endemic species. It is possible to hypothesize that *local* processes, at  
109 the scale of the RN and MMH community, influence the demographic history of small-  
110 range endemics as these fishes are restricted to these two islands. On the contrary,  
111 large-range endemics are present both in RN and in other southern subtropical islands  
112 of the Pacific. As such, populations of these fishes are embedded in metapopulations  
113 of larger geographic ranges than those of small-range endemics. Thus the population  
114 dynamics of large-range endemics are likely to also be affected by *regional* processes  
115 such as fragmentation and dispersal outside of the RN and MMH community.

116

117 Through genome-wide sequencing (ddRAD), we explore the demographic  
118 history of nine endemic species of RN. The species studied here represent the two  
119 types of endemics (small-range and large-range), seven major reef fish families, and  
120 three different reproductive strategies endemics. We examine whether demographic  
121 histories vary (1) according to the current range distribution of the species; (2) with life  
122 history traits; doing so, we investigate the consequence of historical processes such as

123 sea level changes or ecological dynamics driven by reproductive strategy on the  
124 genetic diversity. If historical processes are more important than ecological processes  
125 in the maintenance of endemic species in RN, we expect to find similar population  
126 dynamic for the two types of endemic species. In the same way, if local processes are  
127 more important than regional processes in the maintenance of endemic species in RN,  
128 we expect to find similar assembly time for the two types of endemic species.  
129 Implications for the biogeography of the area are discussed.

130

## 131 **2. Material and methods**

132

### 133 **(a) Sampling**

134 A total of 143 reef fishes (nine species) were collected using polespears or an  
135 anesthetic (clove oil) in Rapa Nui in October 2016 (Table 1). Species were classified as  
136 either small-range or large-range endemics. Small-range endemics only present  
137 around RN and MMH and have a maximum range of <500 km in linear distance, see  
138 Delrieu-Trottin et al. [19]. Southern subtropical endemics have large-ranges (1,000–  
139 8,000 km in linear distance, see Delrieu-Trottin et al. [19], hereafter large-range  
140 endemic species) and are distributed from Southern Polynesia to RN (regional  
141 endemics in Friedlander et al. [9]). The species analyzed here also possess different  
142 reproductive strategies, with five species producing pelagic eggs, three species  
143 producing demersal eggs, and one species brooding eggs in their mouths (Table 1).

144

### 145 **(b) Library preparation and sequencing**

146 Whole genomic DNA was extracted from fin or gill tissue preserved in 96% ethanol  
147 using the GeneJet Genomic DNA purification kit according to the manufacturer's  
148 protocols (Thermo Fisher Scientific). Double-digest restriction-associated DNA  
149 (ddRAD) libraries were prepared following Peterson et al.' protocol [20]. The genomic

150 libraries obtained were sequenced in 3 lanes of a HiSeq 2500 Illumina sequencer  
151 (single end, 125 pb). Illumina reads are available from the Sequence Read Archive  
152 (SRA) at NCBI under the Accession nos. XXXXXX–XXXXXX.

153

#### 154 **(c) De novo assembly**

155 We used the 'process\_radtags.pl' pipeline in STACKS version 2.0 [21,22] to  
156 demultiplex and quality filter the sequences obtained. In the absence of reference  
157 genomes for the species under study, RADSeq loci were assembled de novo using the  
158 'denovo\_map.pl' pipeline in STACKS. We used the parameter combination  
159 recommended by Mastretta-Yanes et al. [23]; this included minimum read depth to  
160 create a stack ( $m$ ) = 3, number of mismatches allowed between loci within individuals  
161 ( $M$ ) = 3, number of mismatches allowed between loci within catalogue ( $n$ ) = 3 and  
162 required a locus to be present in all individuals of each species ( $r$  = 1). Following de  
163 novo mapping, an initial data-filtering step was performed using the population  
164 component of STACKS removing all loci with maximum observed heterozygosity higher  
165 than 0.8. We first kept all single-nucleotide polymorphisms (SNP) per stack (*i.e.* locus)  
166 and did not use any threshold regarding the minor allele frequencies as we obtained a  
167 high coverage for each individual. We then removed all loci displaying more than three  
168 SNPs to avoid potential paralogs. Summary statistics based on the resulting vcf file  
169 (Supplementary material) such as nucleotide diversity ( $\pi$  on variable loci),  
170 heterozygosity ( $H$ ) and  $F_{IS}$ , were calculated for every SNP using  
171 the *populations* program in STACKS. The folded Site (Allele) Frequency Spectrum  
172 (SFS) was computed in R [24] with the package *pegas* [25].

173

#### 174 **(d) Demographic analyses**

175 Variation in the effective population size ( $N_e$ ) through time was investigated using the  
176 composite likelihood approach implemented in the software *stairwayplot* [26]. The

177 *stairwayplot* is a non-parametric model where  $N_e$  is free to vary at each coalescent  
178 interval. The composite likelihood is evaluated as the difference between the observed  
179 SFS and its expectation under a specific demographic history. To confirm the results  
180 obtained by the *stairwayplot*, we ran an additional approximate Bayesian computation  
181 algorithm based on coalescent simulations following Maisano Delser et al [27]. Briefly,  
182 we performed 1,000,000 coalescent simulations of a demographic model with three  
183 instantaneous changes of  $N_e$ . The model is therefore defined by seven parameters:  
184 four values of  $N_e$  and three instantaneous time changes (hereafter,  $T$ ). We set the  
185 same uniform distribution for the four  $N_e$  values and incremental uniform distribution for  
186 the three  $T$  parameters, similarly to Maisano Delser et al [27]. Coalescent simulations  
187 and SFS computation were performed with *fastsimcoal* [28]. We used the SFS and the  
188 mean pairwise differences (computed with a custom R script) as summary statistics.  
189 We retained the best 5,000 simulations to perform a local linear regression [29] and  
190 reconstructed the abc skyline at user specified time points starting from the posterior  
191 distribution as in Maisano Delser et al [27]. We used a mutation rate ( $\mu$ ) of  $1.0 \times 10^{-8}$  /  
192 site / generation following [30–34] and generation times found in the literature (Table 1)  
193 or inferred using maximum standard length.

194

195 As data did not meet assumptions of normality, we computed the Wilcoxon-  
196 Mann-Whitney and Kruskal-Wallis non parametric tests to examine differences in  
197 demography (TMRCA) considering four factors: range size, family, generation time,  
198 and reproductive strategies. All statistical analyses were performed in R, using the  
199 package *vegan* [35] and *ggplot2* was used for graphical representations [36].

200

### 201 **3. Results**

202 *Raw sequence filtering, assembly, and SNP calling.* A total of 31 543 967 reads of 121  
203 bp each were obtained for the 143 individual samples from the nine species endemic to



204 RN. An average of 3 504 885 reads were found per species (min: 2 983 062, max: 4  
205 430 571). The different filtering steps resulted in the building of an average of 41 470  
206 loci (min: 25 331; max: 63 590) per species out of which an average of 23 693 (min: 19  
207 246; max: 28 855) were variable (Table 2). The variable loci harbored an average of 37  
208 107 SNPs (min: 28 239; max: 46 718). The depth of coverage per SNP ranged from  
209 31x to 50x (43x averaged across species).

210

211 *Genetic diversity statistics.* Different levels of genetic diversity were found for the nine  
212 species (Table 2). *Cantherhines rapanui* displayed the highest values of heterozygosity  
213 (max: 0.262) and nucleotide diversity ( $32.73 \times 10^{-4}$ ). *Chrysiptera rapanui* showed the  
214 lowest values of heterozygosity (0.136) while *Ostorhinchus chalcus* displayed the  
215 lowest values of nucleotide diversity (0.063).

216

217 *Community assembly time.* The mean TMRCA retrieved with the stairway plots for the  
218 nine species was very recent 253,871 YBP (+/- 119,482 YBP) and ranged from  
219 105,232 YBP (*Ostorhinchus chalcus*) to 398,058 YBP (*Sargocentron wilhelmi*) (Figure  
220 1). The TMRCA's retrieved did not differ significantly among types of endemics ( $W = 5$ ,  
221  $p = 0.6667$ ), families ( $H_6 = 7.4667$ ,  $p = 0.2798$ ), or reproductive strategy ( $H_2 = 2.56$ ,  $p =$   
222  $0.278$ ). The only significant factor was generation time ( $H_2 = 6.1111$ ,  $p = 0.0471$ ).

223

224 *Changes in historical effective population size.* We recovered very similar demographic  
225 patterns with the two methods (stairway plots and the abc skylines; Figure 1, S1).

226 Patterns of population expansions were recovered for seven out of nine endemic  
227 species studied, constant population size through time was found for one species  
228 (*Sargocentron wilhelmi*) and a decrease in population size was recovered for one  
229 species (*Cantherhines rapanui*). Expansion times retrieved were highly similar between  
230 the two methods for four out of the seven species, while abc skylines estimated older

231 expansion times than those inferred with the stairway plots for the three other cases. In  
232 the same way, the bottleneck found for *Cantherhines rapanui* was dated slightly older  
233 with the abc skyline than with the stairway plot analysis.

234

#### 235 **4. Discussion**

236

237 Rapa Nui endemic species share a common history, with population expansions  
238 dominating the demographic histories dated during the last interglacial period for both  
239 small-range and large-range endemics. These expansions, shaped by historical  
240 processes, indicate that their current effective population size established in RN during  
241 the last glacial maxima (25 000 - 115 000 YBP), a period characterized by climatic  
242 cooling and decreased sea levels [37]. These results agree with those found for  
243 expansions and bottlenecks of other marine organisms suggesting that sea level  
244 oscillations during the last 800 000 years level [38,39] has greatly influenced reef fish  
245 populations [40–49]. Rapa Nui endemics, however, differ in their ecology compared to  
246 organisms of other reefs in the Pacific region, as they are far less restricted in terms of  
247 depth range. Many of the RN endemic species have the particularity to be found from  
248 shallow waters to the mesophotic zone (100 - 150 m) in RN water and in seamounts  
249 nearby RN (Table 1). Considering the network of seamounts surrounding RN, low sea  
250 levels during glacial maxima would have produced periods of maximum reef habitat  
251 extension (Figure 2). As such, population expansions during glacial maxima could  
252 reflect the colonization / recolonization history of RN from MMH or other seamounts of  
253 the RN archipelago. While the Ancient Archipelago hypothesis of Newman & Foster  
254 [12] has been invalidated at the species level for this island system [13], this hypothesis  
255 could explain what is observed at the population level for RN endemic species. Overall,  
256 historical metapopulation dynamics within the RN Archipelago combined with sea level

257 fluctuations during glacial maxima could have driven the population dynamics and  
258 hence community assembly of RN endemics.

259

260         The common demographic and temporal patterns found for large-range and  
261 small-range endemics provide insights into the mechanisms that shaped the RN  
262 ichthyofauna. Community assembly in remote islands is expected to rely on  
263 colonization / extinction / recolonization processes. The concordant expansions  
264 detected for all species except *Cantherines rapanui* and *Sargocentron wilhelmi* suggest  
265 a concomitant establishment of current population sizes during the last glacial cycle.  
266 This pattern does not seem to be influenced by the size of the species range  
267 distribution as both small-range and large-range endemics display similar patterns.  
268 Actually, populations of large-range endemics sampled around RN could potentially  
269 operate at a regional scale, being also present in several other islands of the South  
270 Pacific, but the similar expansion times observed here for both types of endemism  
271 argue in favor of population demography driven by historical processes.

272

273 Local processes rather than regional processes seem to have driven the final stage of  
274 community assembly among endemic species around RN, as indicated by the similar  
275 TMRCA's retrieved here for both types of endemism. This result is also suggested by  
276 the lower species richness observed there compared to in other Pacific islands. The  
277 low species diversity in RN reefs might not only be due to the difficulty for larvae to  
278 colonize such remote islands, but also due to the difficulty to establish a viable  
279 population / metapopulation that functions at such local scales. This hypothesis is  
280 reinforced by the fact that the two large range endemics studied here are among the  
281 most abundant species of RN [9], yet they are rare throughout the rest of their  
282 distribution [50]. Assessing the amount of gene flow between RN populations with

283 those of Pitcairn or Austral Island for these large range endemics could help to test this  
284 hypothesis.

285

286 The relatively small range of TMRCA's retrieved here could also reflect the  
287 success of speciation for small-range endemic species. This has been hypothesized for  
288 French Polynesian small-range endemics which display similarly population  
289 expansions older than the Last Glacial Maximum [17]. Speciation is not an  
290 instantaneous process, and could takes at least 2 My to complete in various vertebrate  
291 clades [51]. Divergence times, upper bound of the speciation time, are known to be  
292 quite recent for several small-range species of this study (*Cantherhines rapanui* 0.54  
293 Ma (0.07 - 1.3 95% HPD), *Chrysiptera rapanui* 1.39 Ma (0.50 - 2.83 95% HPD),  
294 *Chromis randalli* 2.02 (0.58 - 4.3 95 % HPD), *Coris debueni*: 2.31 (0.72 - 4.11 95%  
295 HPD); see [13]). Only a study in a genomic framework based on pairs of sister species  
296 could provide a better estimate of the timing of speciation (**e.g** [33]).

297

298 Coalescence time does vary across loci and across sets of individuals. By  
299 screening thousands of loci, the inferences made on the demographic history of the  
300 populations should not be biased by the loci observed. However, uncertainty in both  
301 mutation rates and generation times can potentially bias molecular dating. Mutation  
302 rates for SNP data of fish range from  $2.5 \times 10^{-8}$  [52] to  $3.5 \times 10^{-9}$  [53] and their selection  
303 for estimating demographic histories is not often justified. As such, we chose the fish  
304 SNP mutation rate most often used in the litterature. Finally, estimations of generation  
305 times in the wild for fishes are scarce. Most of the generation times we used (six out of  
306 nine) were selected from the literature from species that are phylogenetically close-  
307 related to the species studied here (same genus). Additionally, we used maximal length  
308 to infer generation times for three species as maximum standard length and generation  
309 time are positively correlated [54]. If TMRCA's were found to be correlated to

310 generation time, it seems that this parameter did not influence the expansion time  
311 estimates here as we retrieved a common temporal pattern for most species.

312

### 313 *Conclusion*

314 We elucidate for the first time the community assembly time of the RN endemic  
315 reef fish community using genomic data and demographic inferences. We show that  
316 the RN reef fish endemic community shares a common history, with expansion  
317 occurring during the last glacial cycle for the two different types of endemic species.  
318 Local processes based on the seamounts system around RN should have played a  
319 major role in the foundation and persistence of this endemic reef fish community  
320 through dynamic of colonization / extinction / recolonization throughout the RN  
321 Archipelago.

322

323 **Ethics.** All applicable institutional guidelines for the care and use of animals were  
324 followed. Specimens were collected under permit No. 724, 8 March 2016 obtained from  
325 the Chilean Subsecretary of Fishing. The Universidad Austral de Chile Ethical Care  
326 Committee and Biosecurity Protocol approved our use and handling of animals.

327

328 **Data accessibility.** All Fastq sequence files are available from the GenBank at the  
329 National Center for Biotechnology Information short-read archive database (accession  
330 number: *forthcoming*).

331

### 332 **Authors' contributions.**

333 E.D.-T. and P.S.-A. conceived the study; E.D.-T., P.S.-A. and S.M. acquired the  
334 funding; E.D.-T., E.C.G., V.N, C.R.E. and P.S.-A., collected the field data; EDT, P.C.-  
335 B. and A.S. produced the data; E.D.-T.; E.D.-T., N.H., S.M, and P.S.-A. analyzed the

336 data; E.D.-T., N.H., E.C.G., S.M, and P.S.-A wrote the manuscript. All authors gave  
337 final approval for publication.

338

339 **Competing interests.** We declare we have no competing interests.

340

341 **Funding.** This work was supported by the FONDECYT Postdoctorado fellowship  
342 N°3160692 to E. Delrieu-Trottin and by the ATM grant 2016 from the Museum National  
343 d'Histoire Naturelle to Stefano Mona.

344

345 **Acknowledgements.** We thank Rebeca Tepano, Nina, Taveke Olivares Rapu, Liza  
346 Garrido Toleado (SERNAPESCA), Ludovic Tuki (Mesa del Mar, Te Mau O Te Vaikava  
347 O Rapa Nui), and the people of the Rapa Nui Island for their kind and generous  
348 support. We thank Luiz A. Rocha for sharing photographs and information related to  
349 maximum depth of several endemic species. We are grateful to the Genotoul  
350 bioinformatics platform Toulouse Midi-Pyrenees (Bioinfo Genotoul;  
351 <http://bioinfo.genotoul.fr/>) for providing computing resources.

352

### 353 **References**

- 354 1. MacArthur R, Levins R. 1967 The Limiting Similarity, Convergence, and  
355 Divergence of Coexisting Species. *Am. Nat.* (doi:10.1086/282505)
- 356 2. MacArthur RH, Wilson EO. 1967 *The Theory of Island Biogeography*. Princeton  
357 university press.
- 358 3. Emerson BC, Gillespie RG. 2008 Phylogenetic analysis of community assembly  
359 and structure over space and time. *Trends Ecol. Evol.* **23**, 619–630.  
360 (doi:10.1016/j.tree.2008.07.005)

- 361 4. Graham CH, Fine PVA. 2008 Phylogenetic beta diversity: Linking ecological and  
362 evolutionary processes across space in time. *Ecol. Lett.* **11**, 1265–1277.  
363 (doi:10.1111/j.1461-0248.2008.01256.x)
- 364 5. Whittaker RJ, Triantis KA, Ladle RJ. 2008 A general dynamic theory of oceanic  
365 island biogeography. *J. Biogeogr.* (doi:10.1111/j.1365-2699.2008.01892.x)
- 366 6. Ricklefs RE, Bermingham E. 2002 The concept of the taxon cycle in  
367 biogeography. *Glob. Ecol. Biogeogr.* **11**, 353–361. (doi:10.1046/j.1466-  
368 822x.2002.00300.x)
- 369 7. Randall JE, Cea A. 2011 *Shore Fishes of Easter Island*. University of Hawai'i  
370 Press. See  
371 <http://books.google.com/books?hl=en&lr=&id=iXtCTSRTcb8C&pgis=1>.
- 372 8. Cea A. 2016 *Ika Rapa Nui*. Rapa Nui Press.
- 373 9. Friedlander AM, Ballesteros E, Beets J, Berkenpas E, Gaymer CF, Gorny M,  
374 Sala E. 2013 Effects of isolation and fishing on the marine ecosystems of Easter  
375 Island and Salas y Gómez, Chile. *Aquat. Conserv. Mar. Freshw. Ecosyst.* **23**,  
376 515–531. (doi:10.1002/aqc.2333)
- 377 10. Clouard V, Bonneville A. 2005 Ages of seamounts, islands, and plateaus on the  
378 Pacific plate. *Spec. Pap. 388 Plates, plumes Paradig.* **388**, 71–90.  
379 (doi:10.1130/0-8137-2388-4.71)
- 380 11. Ray JS, Mahoney JJ, Duncan RA, Ray J, Wessel P, Naar DF. 2012 Chronology  
381 and geochemistry of lavas from the Nazca Ridge and Easter Seamount Chain:  
382 An ~30 myr hotspot record. *J. Petrol.* **53**, 1417–1448.  
383 (doi:10.1093/petrology/egs021)
- 384 12. Newman W, Foster B. 1983 The Rapanuian faunal district (Easter and Sala y

- 385 Gomez): in search of ancient archipelagos. *Bull. Mar. Sci.* **33**, 633–644.
- 386 13. Delrieu-Trottin E, Brosseau-Acquaviva L, Mona S, Neglia V, Giles EC, Rapu-  
387 Edmunds C, Saenz-Agudelo P. 2019 Understanding the origin of the most  
388 isolated endemic reef fish fauna of the Indo-Pacific: Coral reef fishes of Rapa  
389 Nui. *J. Biogeogr.* **46**, 723–733. (doi:10.1111/jbi.13531)
- 390 14. Bard E, Hamelin B, Arnold M, Montaggioni L, Cabioch G, Faure G, Rougerie F.  
391 1996 Deglacial sea-level record from Tahiti corals and the timing of global  
392 meltwater discharge. *Nature* **382**, 241–244. (doi:10.1038/382241a0)
- 393 15. Hewitt GM. 2004 The structure of biodiversity -- insights from molecular  
394 phylogeography. *Front. Zool.* **1**, 4. (doi:10.1186/1742-9994-1-4)
- 395 16. Woodroffe CD, Brooke BP, Linklater M, Kennedy DM, Jones BG, Buchanan C,  
396 Mleczko R, Hua Q, Zhao JX. 2010 Response of coral reefs to climate change:  
397 Expansion and demise of the southernmost pacific coral reef. *Geophys. Res.*  
398 *Lett.* **37**, L15602. (doi:10.1029/2010GL044067)
- 399 17. Delrieu-Trottin E, Mona S, Maynard J, Neglia V, Veuille M, Planes S. 2017  
400 Population expansions dominate demographic histories of endemic and  
401 widespread Pacific reef fishes. *Sci. Rep.* **7**, 40519. (doi:10.1038/srep40519)
- 402 18. Pinheiro HT, Bernardi G, Simon T, Joyeux J-C, Macieira RM, Gasparini JL,  
403 Rocha C, Rocha LA. 2017 Island biogeography of marine organisms. *Nature*  
404 **549**, 82.
- 405 19. Delrieu-Trottin E, Maynard J, Planes S. 2014 Endemic and widespread coral  
406 reef fishes have similar mitochondrial genetic diversity. *Proc. R. Soc. B Biol. Sci.*  
407 **281**. (doi:10.1098/rspb.2014.1068)
- 408 20. Peterson BK, Weber JN, Kay EH, Fisher HS, Hoekstra HE. 2012 Double digest



- 409 RADseq: An inexpensive method for de novo SNP discovery and genotyping in  
410 model and non-model species. *PLoS One* **7**.  
411 (doi:10.1371/journal.pone.0037135)
- 412 21. Catchen JM, Amores A, Hohenlohe P, Cresko W, Postlethwait JH. 2011  
413 Stacks: Building and Genotyping Loci De Novo From Short-Read Sequences.  
414 *G3 Genes/Genomes/Genetics* **1**, 171–182. (doi:10.1534/g3.111.000240)
- 415 22. Catchen J, Hohenlohe PA, Bassham S, Amores A, Cresko WA. 2013 Stacks: An  
416 analysis tool set for population genomics. *Mol. Ecol.* **22**, 3124–3140.  
417 (doi:10.1111/mec.12354)
- 418 23. Mastretta-Yanes A, Arrigo N, Alvarez N, Jorgensen TH, Piñero D, Emerson BC.  
419 2015 Restriction site-associated DNA sequencing, genotyping error estimation  
420 and de novo assembly optimization for population genetic inference. *Mol. Ecol.*  
421 *Resour.* **15**, 28–41. (doi:10.1111/1755-0998.12291)
- 422 24. R Core Team. 2017 R: A Language and Environment for Statistical Computing.  
423 *R Found. Stat. Comput. Vienna, Austria.* **0**, {ISBN} 3-900051-07-0.  
424 (doi:http://www.R-project.org/)
- 425 25. Paradis E. 2010 pegas: an {R} package for population genetics with an  
426 integrated--modular approach. *Bioinformatics* **26**, 419–420.
- 427 26. Liu X, Fu YX. 2015 Exploring population size changes using SNP frequency  
428 spectra. *Nat. Genet.* **47**, 555–559. (doi:10.1038/ng.3254)
- 429 27. Maisano Delser P, Corrigan S, Hale M, Li C, Veuille M, Planes S, Naylor G,  
430 Mona S. 2016 Population genomics of *C. melanopterus* using target gene  
431 capture data: demographic inferences and conservation perspectives. *Sci. Rep.*  
432 **6**, 33753. (doi:10.1038/srep33753)

- 433 28. Excoffier L, Dupanloup I, Huerta-Sánchez E, Sousa VC, Foll M. 2013 Robust  
434 Demographic Inference from Genomic and SNP Data. *PLoS Genet.* **9**.  
435 (doi:10.1371/journal.pgen.1003905)
- 436 29. Beaumont MA, Zhang W, Balding DJ. 2002 Approximate Bayesian computation  
437 in population genetics. *Genetics*
- 438 30. Jacobs A, Hughes M, Robinson P, Adams C, Elmer K. 2018 The Genetic  
439 Architecture Underlying the Evolution of a Rare Piscivorous Life History Form in  
440 Brown Trout after Secondary Contact and Strong Introgression. *Genes (Basel)*.  
441 **9**, 280. (doi:10.3390/genes9060280)
- 442 31. Le Moan A, Gagnaire PA, Bonhomme F. 2016 Parallel genetic divergence  
443 among coastal-marine ecotype pairs of European anchovy explained by  
444 differential introgression after secondary contact. *Mol. Ecol.*  
445 (doi:10.1111/mec.13627)
- 446 32. Souissi A, Bonhomme F, Machado M, Bahri-Sfar L, Gagnaire PA. 2018  
447 Genomic and geographic footprints of differential introgression between two  
448 divergent fish species (*Solea* spp.). *Heredity (Edinb)*. (doi:10.1038/s41437-018-  
449 0079-9)
- 450 33. Rougeux C, Bernatchez L, Gagnaire PA. 2017 Modeling the multiple facets of  
451 speciation-with-gene-flow toward inferring the divergence history of lake  
452 whitefish species pairs (*Coregonus clupeaformis*). *Genome Biol. Evol.* **9**, 2057–  
453 2074. (doi:10.1093/gbe/evx150)
- 454 34. Tine M *et al.* 2014 European sea bass genome and its variation provide insights  
455 into adaptation to euryhalinity and speciation. *Nat. Commun.* **5**, 5770.  
456 (doi:10.1038/ncomms6770)
- 457 35. Oksanen J *et al.* 2012 vegan: Community Ecology Package. R package version

- 458 2.1-20/r2309. *www.R-project.org*, 1–255.
- 459 36. Wickham H. 2009 *ggplot2: Elegant Graphics for Data Analysis*. Springer-Verlag  
460 New York. See <http://ggplot2.org>.
- 461 37. Miller KG *et al.* 2005 The Phanerozoic Record of Global Sea-Level Change.  
462 *Science (80- )*. **310**, 1293–1298. (doi:10.1126/science.1116412)
- 463 38. Augustin L *et al.* 2004 Eight glacial cycles from an Antarctic ice core. *Nature*  
464 (doi:10.1038/nature02599)
- 465 39. McManus JF. 2004 A great grand-daddy of ice cores. *Nature*  
466 (doi:10.1038/429611a)
- 467 40. Robertson DR. 2004 High genetic diversities and complex genetic structure in an  
468 Indo-Pacific tropical reef fish (*Chlorurus sordidus*): evidence of an unstable  
469 evolutionary past? *Mar. Biol.*, 757–767. (doi:10.1007/s00227-003-1224-3)
- 470 41. Craig MT, Eble JA, Bowen BW, Robertson DR. 2007 High genetic connectivity  
471 across the Indian and Pacific Oceans in the reef fish *Myripristis berndti*  
472 (Holocentridae). *Mar. Ecol. Prog. Ser.* **334**, 245–254. (doi:10.3354/meps334245)
- 473 42. Craig MT, Eble JA, Bowen BW. 2010 Origins, ages and population histories:  
474 Comparative phylogeography of endemic Hawaiian butterflyfishes (genus  
475 *Chaetodon*). *J. Biogeogr.* **37**, 2125–2136. (doi:10.1111/j.1365-  
476 2699.2010.02358.x)
- 477 43. Crandall ED, Frey MA, Grosberg RK, Barber PH. 2008 Contrasting demographic  
478 history and phylogeographical patterns in two Indo-Pacific gastropods. *Mol. Ecol.*  
479 **17**, 611–626. (doi:10.1111/j.1365-294X.2007.03600.x)
- 480 44. Fauvelot C, Bernardi G, Planes S. 2003 Reductions in the mitochondrial DNA  
481 diversity of coral reef fish provide evidence of population bottlenecks resulting

- 482 from Holocene sea-level change. *Evolution* **57**, 1571–1583. (doi:10.1111/j.0014-  
483 3820.2003.tb00365.x)
- 484 45. Gaither MR, Toonen RJ, Robertson DR, Planes S, Bowen BW. 2010 Genetic  
485 evaluation of marine biogeographical barriers: Perspectives from two  
486 widespread Indo-Pacific snappers (*Lutjanus kasmira* and *Lutjanus fulvus*). *J.*  
487 *Biogeogr.* **37**, 133–147. (doi:10.1111/j.1365-2699.2009.02188.x)
- 488 46. Hellberg ME. 2001 Climate-Driven Range Expansion and Morphological  
489 Evolution in a Marine Gastropod. *Science (80-. )*. **292**, 1707–1710.  
490 (doi:10.1126/science.1060102)
- 491 47. Horne JB, van Herwerden L, Choat JH, Robertson DR. 2008 High population  
492 connectivity across the Indo-Pacific: Congruent lack of phylogeographic  
493 structure in three reef fish congeners. *Mol. Phylogenet. Evol.* **49**, 629–638.  
494 (doi:10.1016/j.ympev.2008.08.023)
- 495 48. Klanten OS, Choat JH, Van Herwerden L. 2007 Extreme genetic diversity and  
496 temporal rather than spatial partitioning in a widely distributed coral reef fish.  
497 *Mar. Biol.* **150**, 659–670. (doi:10.1007/s00227-006-0372-7)
- 498 49. Winters KL, van Herwerden L, Choat JH, Robertson DR. 2010 Phylogeography  
499 of the Indo-Pacific parrotfish *Scarus psittacus*: Isolation generates distinctive  
500 peripheral populations in two oceans. *Mar. Biol.* **157**, 1679–1691.  
501 (doi:10.1007/s00227-010-1442-4)
- 502 50. Randall JE. 2005 *Reef and Shore Fishes of the South Pacific*: *New Caledonia*  
503 *to Tahiti and the Pitcairn Islands*. University of Hawai'i Press Honolulu.
- 504 51. Avise JC, Walker D, Johns GC. 1998 Speciation durations and Pleistocene  
505 effects on vertebrate phylogeography. *Proc. R. Soc. B Biol. Sci.* **265**, 1707–  
506 1712. (doi:10.1098/rspb.1998.0492)

- 507 52. Kavembe GD, Kautt AF, Machado-Schiaffino G, Meyer A. 2016 Eco-  
508 morphological differentiation in Lake Magadi tilapia, an extremophile cichlid fish  
509 living in hot, alkaline and hypersaline lakes in East Africa. *Mol. Ecol.* **25**, 1610–  
510 1625. (doi:10.1111/mec.13461)
- 511 53. Malinsky M, Svardal H, Tyers AM, Miska EA, Genner MJ, Turner GF, Durbin R.  
512 2018 Whole-genome sequences of Malawi cichlids reveal multiple radiations  
513 interconnected by gene flow. *Nat. Ecol. Evol.* **2**, 1940–1955.  
514 (doi:10.1038/s41559-018-0717-x)
- 515 54. Froese R, Binohlan C. 2000 Empirical relationships to estimate asymptotic  
516 length, length at first maturity and length at maximum yield per recruit in fishes,  
517 with a simple method to evaluate length frequency data. *J. Fish Biol.* **56**, 758–  
518 773. (doi:10.1111/j.1095-8649.2000.tb00870.x)
- 519 55. Pante E, Simon-Bouhet B. 2013 marmap: A Package for Importing, Plotting and  
520 Analyzing Bathymetric and Topographic Data in R. *PLoS One* **8**, 1–4.  
521 (doi:10.1371/journal.pone.0073051)
- 522 56. Bowen BW, Muss A, Rocha LA, Grant WS. 2006 Shallow mtDNA coalescence in  
523 Atlantic pygmy angelfishes (genus *Centropyge*) indicates a recent invasion from  
524 the Indian Ocean. *J. Hered.* **97**, 1–12. (doi:10.1093/jhered/esj006)
- 525 57. Gajdzik L, Bernardi G, Lepoint G, Frédérick B. 2018 Genetic diversity mirrors  
526 trophic ecology in coral reef fish feeding guilds. *Mol. Ecol.* **27**, 5004–5018.  
527 (doi:10.1111/mec.14936)
- 528 58. Easton EE, Sellanes J, Berkenpas E, Gaymer CF, Morales N, Gorny M. 2017  
529 Diversity of deep-sea fishes of the Easter Island Ecoregion. *Deep. Res. Part II*  
530 **137**, 78–88. (doi:10.1016/j.dsr2.2016.12.006)
- 531



533 **Figure captions**

534 **Figure 1.** Stairway plots for large-range (red) and small-range endemics (black)  
535 representing the variation of effective population size through time and sea level  
536 fluctuations for the past 400 000 years using data from [37]. Dark tones indicate glacial  
537 era characterized by rises of the sea level while greys tones indicate inter-glacial era  
538 with lower sea level.

539

540 **Figure 2.** Surface of potential habitat for Rapa Nui endemic reef fish species computed  
541 using the package marmap [55] in R [24]. Present conditions (red) and past conditions  
542 during the glacial maximums (orange).

543

544 **Supplementary Material.**

545 **Figure S1.** Median of effective population sizes ( $N_e$ ) based on stairway plots and abc  
546 skylines analyses.

547 **Table 1 Ecological data on the species of interest of this study. Range size (S: small-range size; L: large-range size), Family,**  
 548 **Maximum Depth where the species have been observed (Max. depth) and reference associated (<sup>1</sup>: specimens photographed at**  
 549 **those depths by Luiz A. Rocha; <sup>2</sup>: personal observation from Cristian Rapu-Edmunds freediving); generation time used for this**  
 550 **study and references associated, maximum size of the species. Codes for reproductive strategy are: [p] pelagic eggs, [b]**  
 551 **demersal eggs and [m] mouth brooding.**

| Range |                    |                             |                  | Generation time | Max. size |
|-------|--------------------|-----------------------------|------------------|-----------------|-----------|
| Size  | Family             | Species                     | Max. depth (m)   | (years)         | (TL, cm)  |
| S     | Monacanthidae [b]  | <i>Cantherhines rapanui</i> | 20 [7]           | 3               | 20        |
| S     | Apogonidae [m]     | <i>Ostorhinchus chalcus</i> | 25 [7]           | 2               | 16        |
| L     | Pomacanthidae [p]  | <i>Centropyge hotumatua</i> | 50 [7]           | 1 [56]          | 9         |
| S     | Pomacentridae [b]  | <i>Chrysiptera rapanui</i>  | 72 <sup>1</sup>  | 1 [57]          | 7.8       |
| S     | Labridae [p]       | <i>Coris debueni</i>        | 70 <sup>1</sup>  | 3               | 27        |
| L     | Holocentridae [p]  | <i>Myripristis tiki</i>     | 80 <sup>2</sup>  | 3 [41]          | 26.5      |
| S     | Pomacentridae [b]  | <i>Chromis randalli</i>     | 105 <sup>1</sup> | 2 [57]          | 15        |
| S     | Chaetodontidae [p] | <i>Chaetodon litus</i>      | 105              | 2 [42]          | 15.5      |
| S     | Holocentridae [p]  | <i>Sargocentron wilhmi</i>  | 157 [58]         | 3 [41]          | 19.5      |



552 **Table 2. Summary of genetic data for each species.** Sample size and molecular metrics for each species of the study. Observed (Ho)  
 553 and expected (He) heterozygosity computed on variable loci;  $F_{IS}$ , inbreeding coefficient. <sup>1</sup>Nucleotide diversity across all loci ( $\pi$  across all  
 554 loci =  $\pi$  on variable loci x No. SNP / No. of variable RADSeq loci x length of RAD loci). Maximum (in bold) and minimum (italics) values  
 555 are highlighted for all columns.

| Species                     | No. of ind | No. of Sites TOTAL | No. of RADSeq loci | No. of variable RADSeq loci | No. SNP       | $\pi$ across variable sites | Ho           | He           | $F_{IS}$     | $\pi$ across all sites <sup>1</sup> ( $10^{-4}$ ) |
|-----------------------------|------------|--------------------|--------------------|-----------------------------|---------------|-----------------------------|--------------|--------------|--------------|---------------------------------------------------|
| <i>Cantherhines rapanui</i> | 15         | 5 373 281          | 44 233             | 20 052                      | 28 239        | <b>0.271</b>                | <b>0.262</b> | <b>0.260</b> | 0.023        | <b>32.73</b>                                      |
| <i>Centropyge hotumatua</i> | 15         | 3 563 265          | 29 195             | 21 684                      | 38 816        | <i>0.163</i>                | 0.156        | 0.158        | 0.032        | 25.21                                             |
| <i>Chaetodon litus</i>      | 15         | 5 024 341          | 41 439             | 21 905                      | 33 421        | 0.227                       | 0.220        | 0.219        | 0.022        | 29.86                                             |
| <i>Chromis randalli</i>     | 13         | 4 247 760          | 34 893             | 24 673                      | 43 844        | 0.172                       | 0.161        | 0.165        | <b>0.043</b> | 26.34                                             |
| <i>Chrysiptera rapanui</i>  | 18         | 3 104 187          | 25 331             | 19 246                      | 35 735        | 0.145                       | <i>0.137</i> | <i>0.141</i> | 0.039        | 23.25                                             |
| <i>Coris debueni</i>        | 14         | 5 817 876          | 47 949             | 28 594                      | 45 870        | 0.216                       | 0.208        | 0.209        | 0.029        | 29.94                                             |
| <i>Myripristis tiki</i>     | 18         | 5 522 762          | 45 432             | <b>28 855</b>               | <b>46 718</b> | 0.165                       | 0.159        | 0.160        | 0.025        | 23.00                                             |
| <i>Ostorhinchus chalcus</i> | 19         | <b>7 702 975</b>   | <b>63 590</b>      | 24 019                      | 32 224        | 0.166                       | 0.165        | 0.162        | <i>0.008</i> | 19.19                                             |

|                            |    |           |        |        |        |       |       |       |       |       |
|----------------------------|----|-----------|--------|--------|--------|-------|-------|-------|-------|-------|
| <i>Sargocentron wilhmi</i> | 16 | 5 009 870 | 41 234 | 24 207 | 37 860 | 0.224 | 0.217 | 0.217 | 0.026 | 30.98 |
|----------------------------|----|-----------|--------|--------|--------|-------|-------|-------|-------|-------|

---

*Ostorhynchus chalcicus*

$3 \times 10^5$   
 $1 \times 10^5$   
 $3 \times 10^4$   
 $1 \times 10^4$

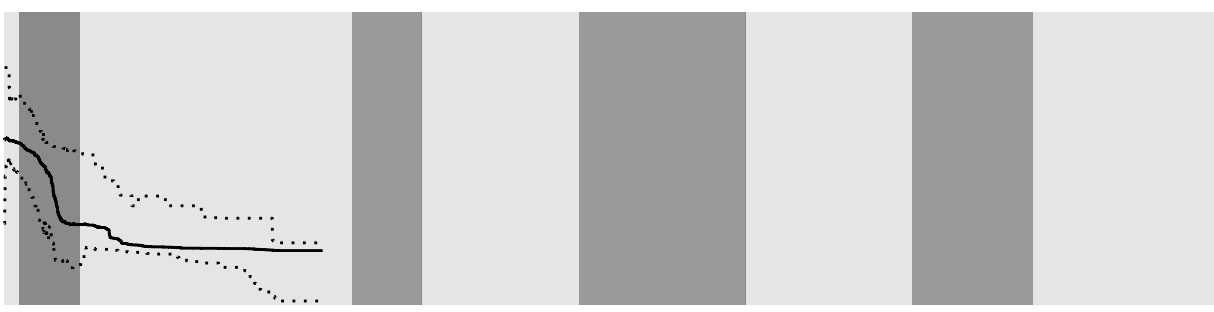

*Chrysiptera rapanui*

$3 \times 10^5$   
 $1 \times 10^5$   
 $3 \times 10^4$   
 $1 \times 10^4$

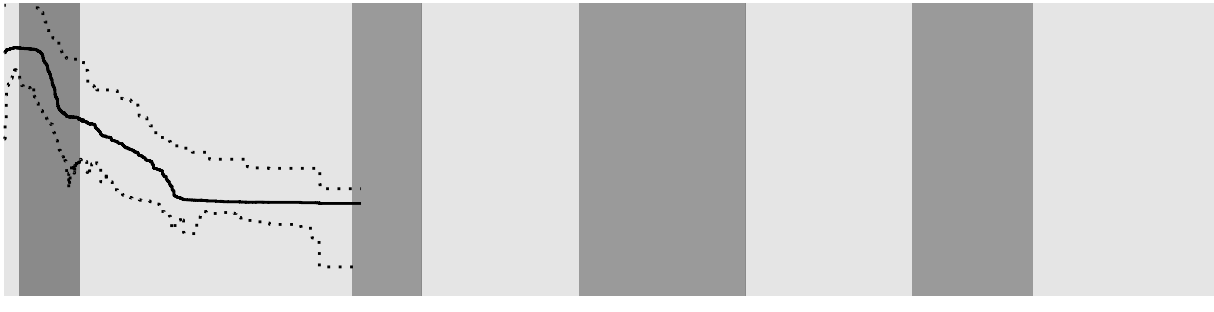

*Centropyge hotumatua*

$3 \times 10^5$   
 $1 \times 10^5$   
 $3 \times 10^4$   
 $1 \times 10^4$

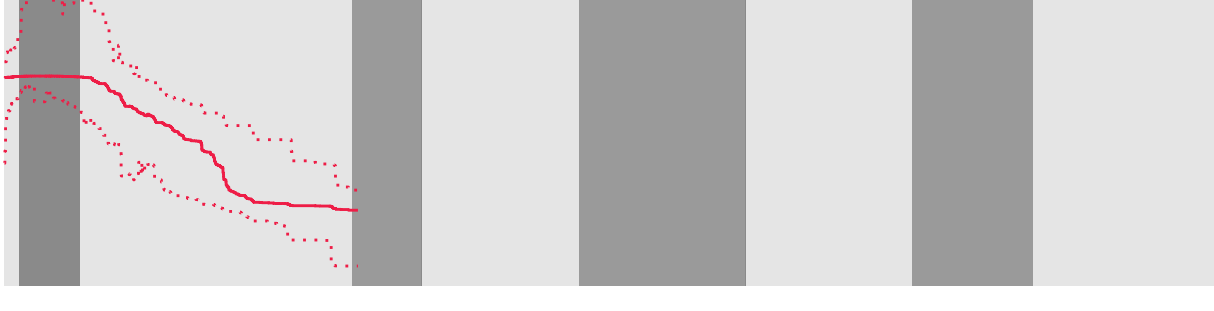

*Chaetodon litus*

$3 \times 10^5$   
 $1 \times 10^5$   
 $3 \times 10^4$   
 $1 \times 10^4$

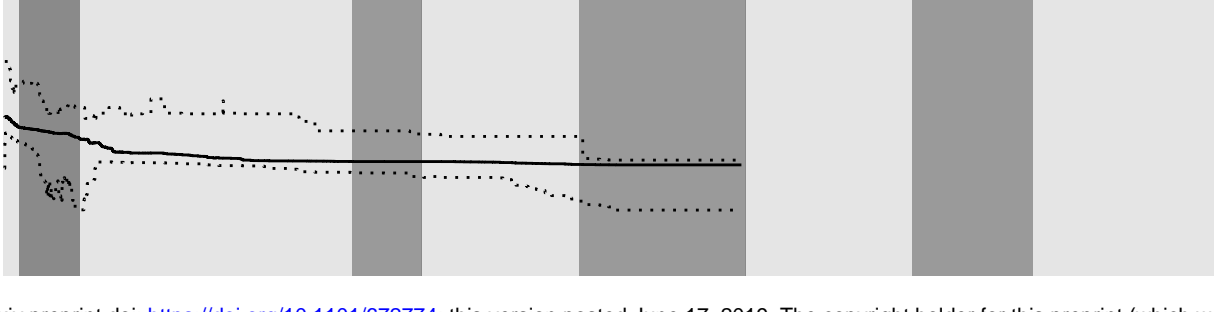

bioRxiv preprint doi: <https://doi.org/10.1101/672774>; this version posted June 17, 2019. The copyright holder for this preprint (which was not certified by peer review) is the author/funder, who has granted bioRxiv a license to display the preprint in perpetuity. It is made available under aCC-BY-NC-ND 4.0 International license.

*Chromis randalli*

$3 \times 10^5$   
 $1 \times 10^5$   
 $3 \times 10^4$   
 $1 \times 10^4$

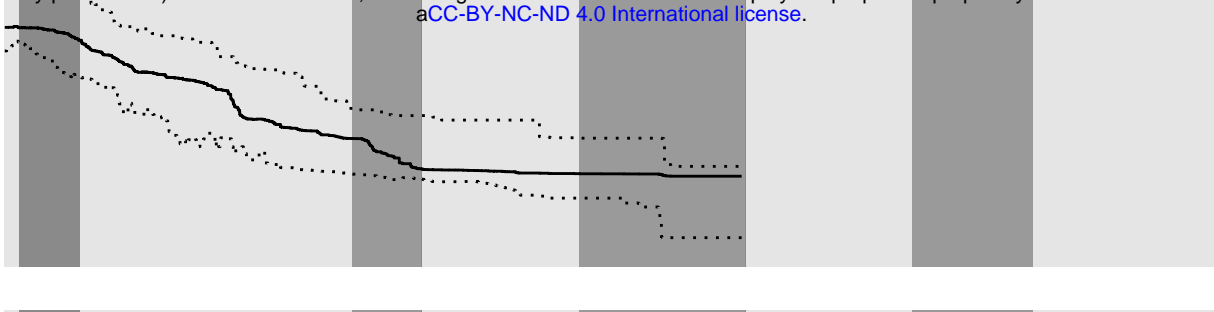

*Myripristis tiki*

$3 \times 10^5$   
 $1 \times 10^5$   
 $3 \times 10^4$   
 $1 \times 10^4$

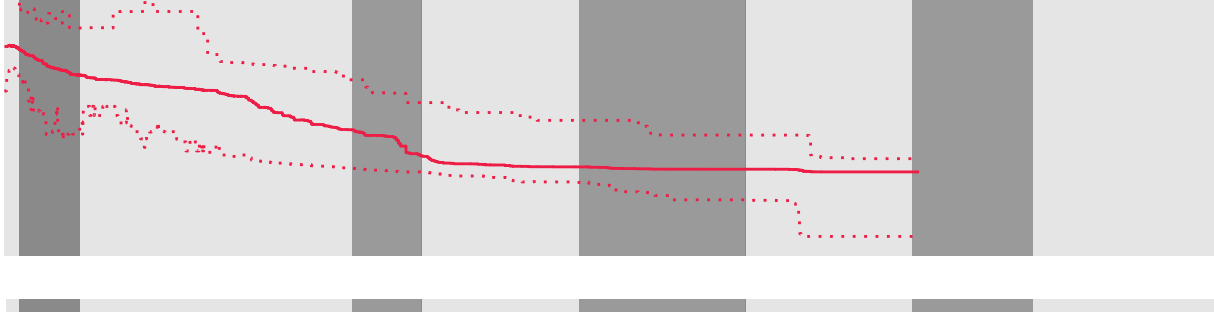

*Cantherhines rapanui*

$3 \times 10^5$   
 $1 \times 10^5$   
 $3 \times 10^4$   
 $1 \times 10^4$

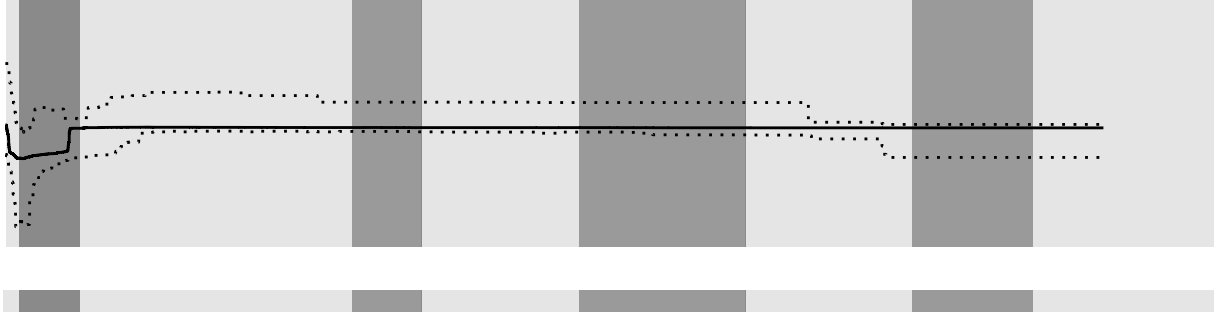

*Sargocentron wilhelmi*

$3 \times 10^5$   
 $1 \times 10^5$   
 $3 \times 10^4$   
 $1 \times 10^4$

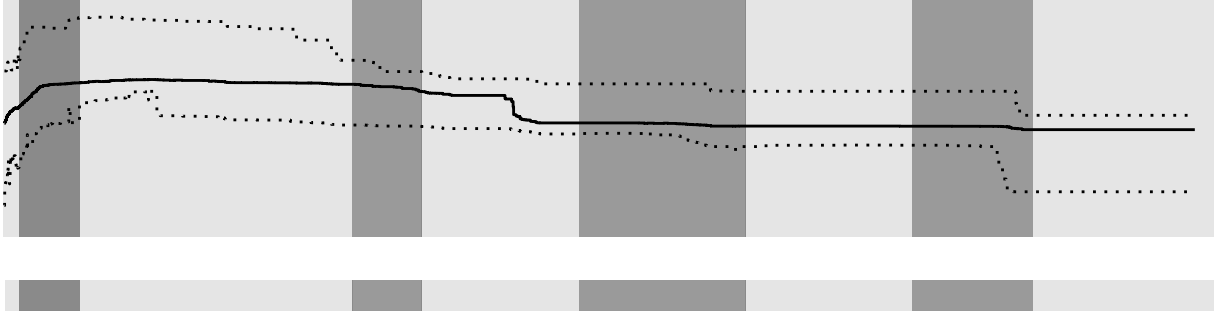

*Coris debueni*

$3 \times 10^5$   
 $1 \times 10^5$   
 $3 \times 10^4$   
 $1 \times 10^4$

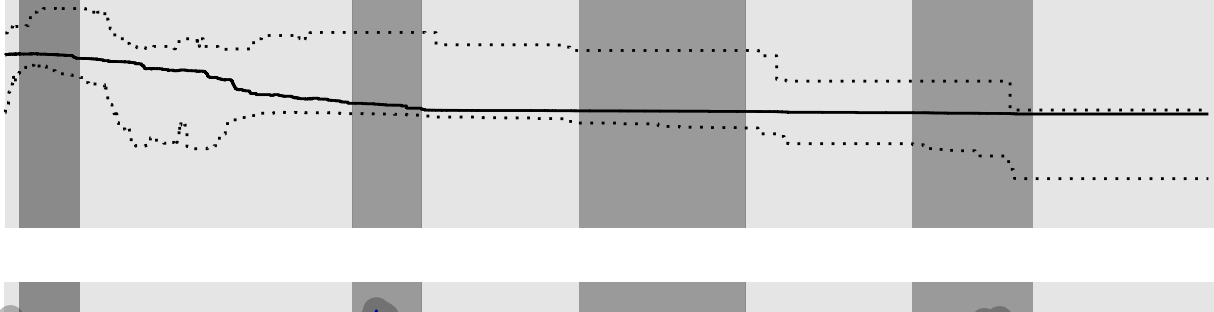

Sea Level (m)

0  
-50  
-100

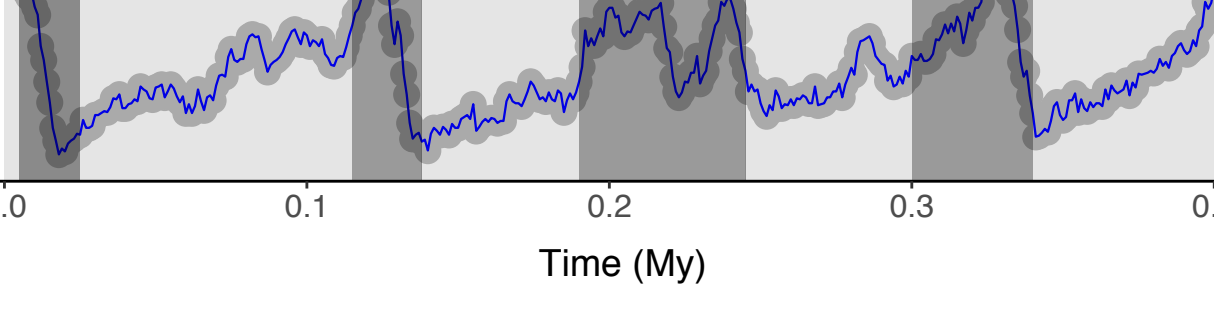

0.0 0.1 0.2 0.3 0.4

Time (My)

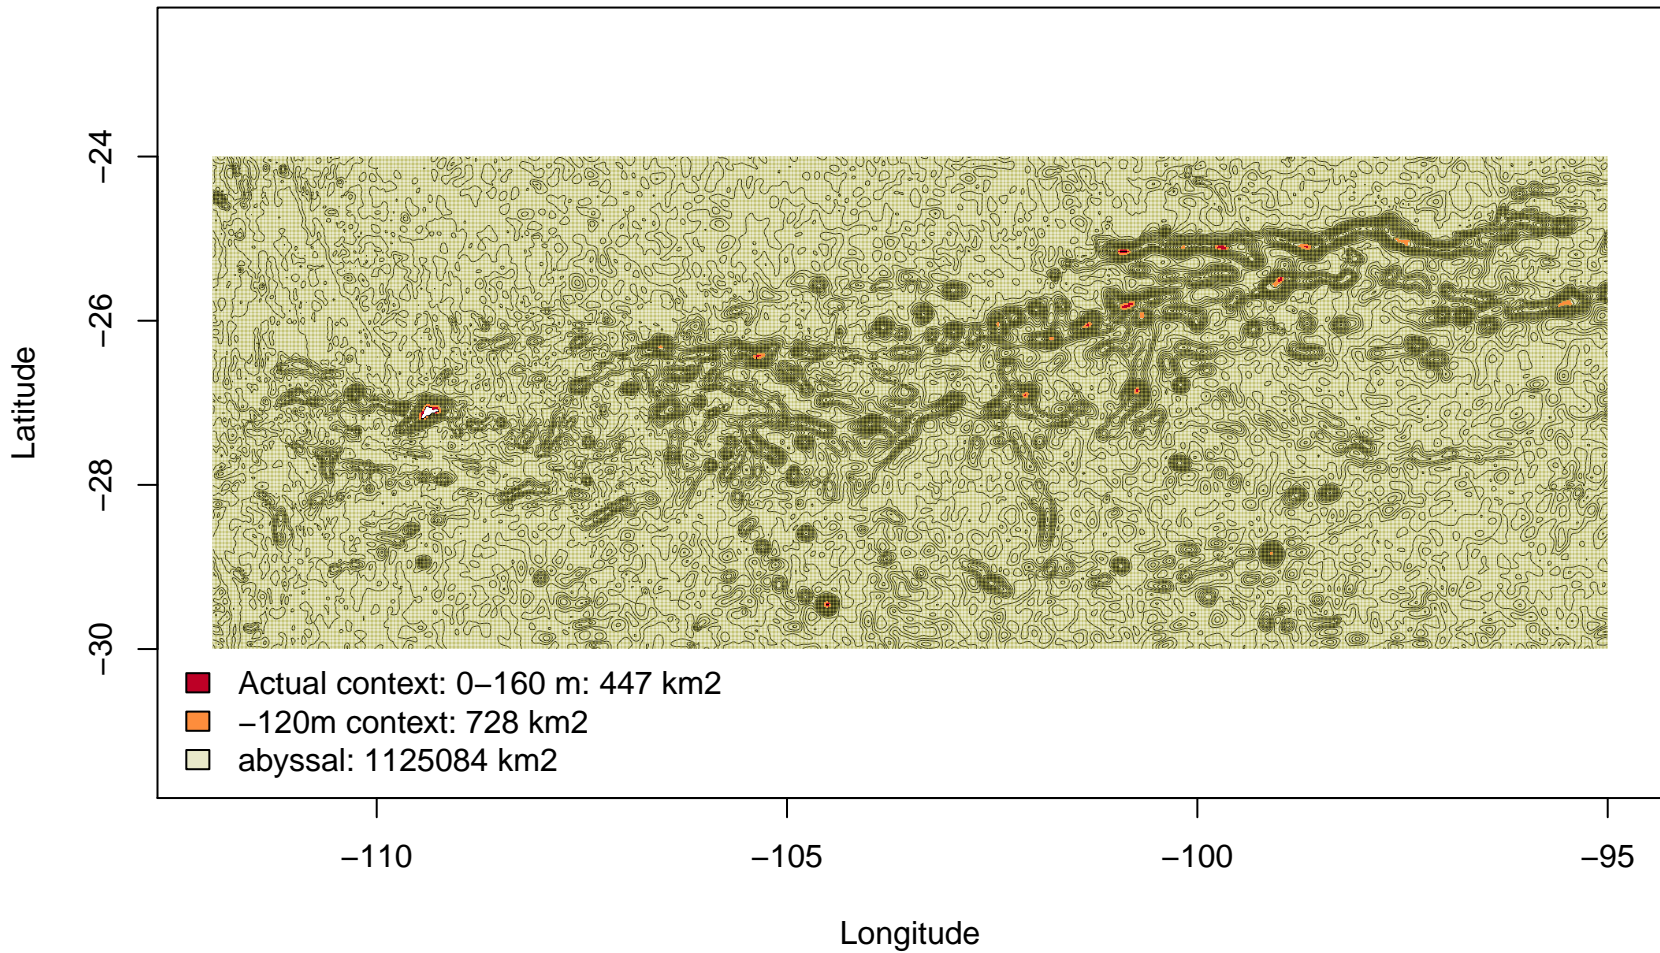

Source: http://biorxiv.org/content/10.1101/672774v1.full.pdf
